# Supplementary material for: Urinary alkylresorcinol metabolites, biomarkers of whole grain wheat and rye intake, are beneficially associated with liver fat and other fat measures
Source: Royal Society of Chemistry journal article supplement (doi:10.1039/d4fo01248h), 2024-01-01
Supplement: d4fo01248h1.pdf [file d4fo01248h1.pdf]

## Supplementary Materials

**Supplementary Figure 1** The overall study design of the Anhui Lifestyle Validation Study.

**Supplementary Table 1** The characteristics of participants according to urinary alkylresorcinols metabolites concentrations at baseline and after 1-year of follow-up in Huoshan, China.

**Supplementary Table 2** Subgroup analysis on the association between urinary total alkylresorcinols metabolites and body fat measures in one-year longitudinal repeated-measures in Huoshan, China.

**Supplementary Table 3** Subgroup analysis on the association between the average concentrations of urinary total alkylresorcinols metabolites and fat measures after 1-year of follow-up in Huoshan, China.

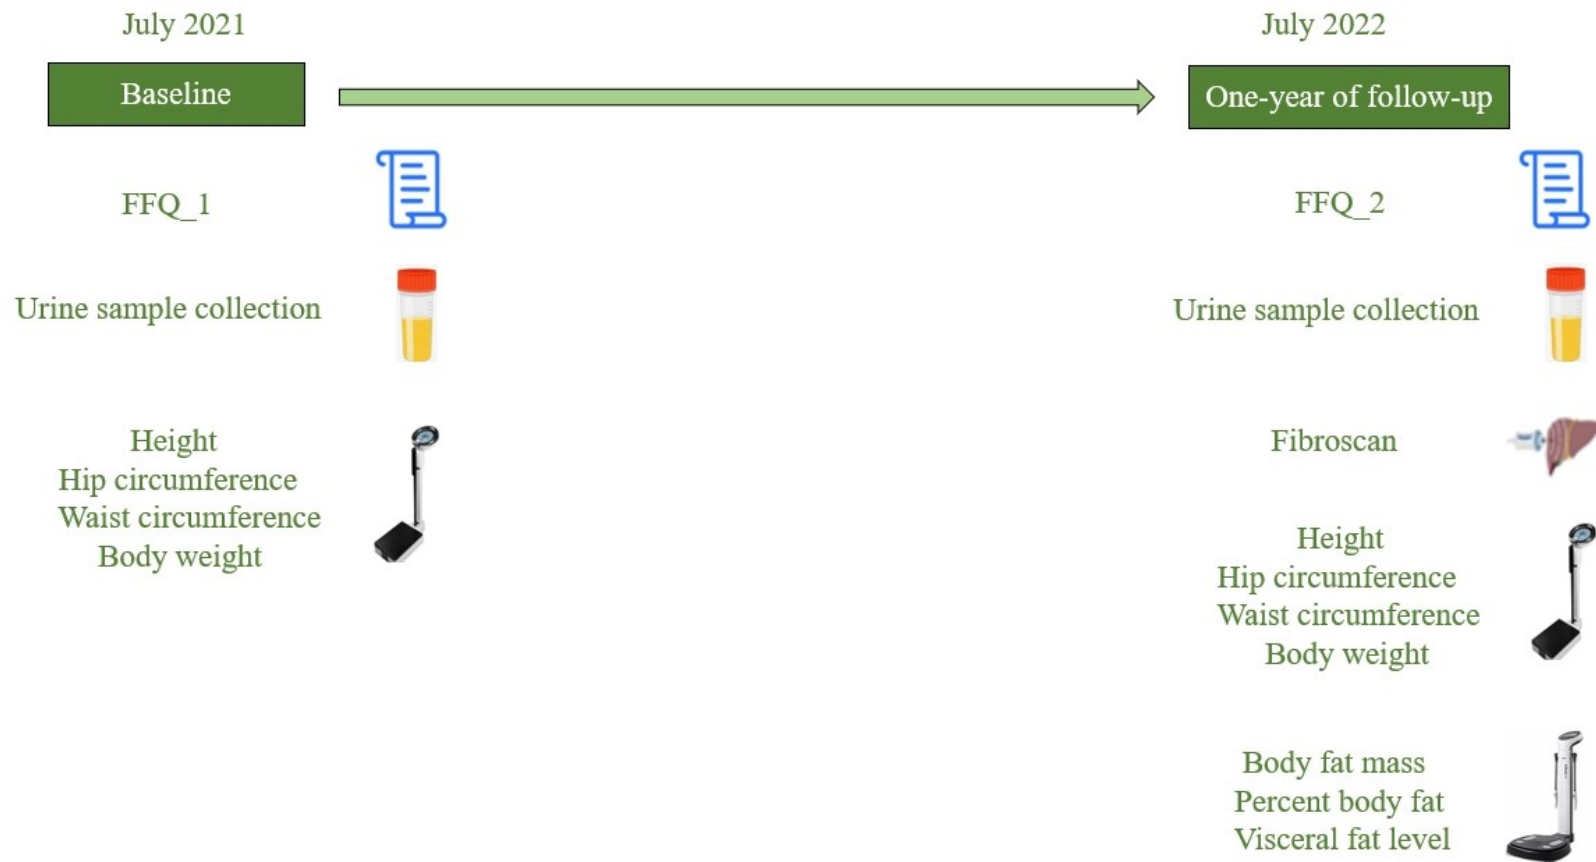

**Supplementary Figure 1** The overall study design of the Anhui Lifestyle Validation Study. FFQ, food frequency questionnaire.

**Supplementary Table 1** The characteristics of participants according to urinary alkylresorcinols metabolites concentrations at baseline and after 1-year of follow-up in Huoshan, China<sup>a</sup>.

| Characteristic                             | DHPPA at baseline   |                     |                     | DHBA at baseline    |                     |                     | DHPPA after 1-year of follow-up |                     |                     | DHBA after 1-year of follow-up |                     |                     |
|--------------------------------------------|---------------------|---------------------|---------------------|---------------------|---------------------|---------------------|---------------------------------|---------------------|---------------------|--------------------------------|---------------------|---------------------|
|                                            | Tertile 1           | Tertile 2           | Tertile 3           | Tertile 1           | Tertile 2           | Tertile 3           | Tertile 1                       | Tertile 2           | Tertile 3           | Tertile 1                      | Tertile 2           | Tertile 3           |
| No. of participants                        | 102                 | 102                 | 102                 | 102                 | 102                 | 102                 | 102                             | 102                 | 102                 | 102                            | 102                 | 102                 |
| Age*, years                                | 48.2<br>(14.3)      | 47.4<br>(14.2)      | 50.2<br>(16.1)      | 48.5<br>(14.5)      | 47.0<br>(15.2)      | 50.4<br>(14.9)      | 46.6<br>(15.8)                  | 50.8<br>(15.6)      | 51.6<br>(12.7)      | 47.6<br>(16.2)                 | 49.6<br>(15.4)      | 51.8<br>(12.7)      |
| Female <sup>§§</sup> , %                   | 50.7                | 64.2                | 51.4                | 41.8                | 58.4                | 65.1                | 56.7                            | 50.9                | 56.1                | 44.1                           | 63.4                | 59.5                |
| household per capita income*, %            |                     |                     |                     |                     |                     |                     |                                 |                     |                     |                                |                     |                     |
| <10000 Yuan                                | 29.9                | 48.9                | 30.9                | 24.4                | 45.5                | 32.4                | 28.6                            | 19.6                | 25.6                | 24.0                           | 19.3                | 20.9                |
| ≥10000 Yuan                                | 70.1                | 51.1                | 69.1                | 75.6                | 54.5                | 67.6                | 71.4                            | 80.4                | 74.4                | 76.0                           | 80.7                | 79.1                |
| Educational level, %                       |                     |                     |                     |                     |                     |                     |                                 |                     |                     |                                |                     |                     |
| Primary school or below                    | 34.6                | 45.2                | 50.2                | 36.2                | 49.8                | 37.3                | 43.6                            | 35.0                | 42.5                | 36.7                           | 44.5                | 36.4                |
| Junior high school                         | 27.8                | 26.7                | 24.1                | 26.2                | 27.5                | 29.1                | 27.0                            | 32.5                | 32.4                | 29.6                           | 29.8                | 34.5                |
| Senior high school or above                | 37.6                | 28.1                | 25.7                | 37.6                | 22.7                | 33.6                | 29.4                            | 32.4                | 25.1                | 33.7                           | 25.7                | 29.1                |
| Current tea drinkers <sup>**‡</sup> , %    | 42.8                | 37.4                | 63.3                | 50.4                | 44.1                | 47.1                | 39.8                            | 54.6                | 62.9                | 43.9                           | 52.9                | 56.8                |
| Current smokers, %                         | 16.2                | 18.9                | 22.2                | 31.0                | 21.6                | 16.1                | 17.3                            | 20.1                | 28.8                | 30.0                           | 14.8                | 26.5                |
| Current drinkers*, %                       | 24.8                | 10.9                | 22.9                | 24.5                | 18.3                | 14.4                | 12.9                            | 17.2                | 18.9                | 18.6                           | 16.5                | 12.7                |
| Diabetes, %                                | 8.5                 | 10.4                | 15.1                | 12.4                | 11.8                | 10.7                | 21.1                            | 6.1                 | 18.7                | 11.9                           | 9.2                 | 18.3                |
| Hypertension, %                            | 51.1                | 45.6                | 53.1                | 50.8                | 57.4                | 44.6                | 47.4                            | 52.7                | 47.3                | 50.3                           | 48.5                | 48.2                |
| Physical activities                        |                     |                     |                     |                     |                     |                     |                                 |                     |                     |                                |                     |                     |
| METS-h/week                                | 141<br>(98-194)     | 143<br>(108-199)    | 154<br>(93-202)     | 148<br>(111-199)    | 145<br>(101-212)    | 141<br>(92-190)     | 157<br>(108-215)                | 139<br>(90-200)     | 144<br>(96-202)     | 136<br>(88-193)                | 145<br>(106-227)    | 144<br>(96-206)     |
| Total energy intake <sup>†§</sup> , kcal/d | 2062<br>(1691-2695) | 2139<br>(1646-2852) | 2219<br>(1621-2799) | 2334<br>(1786-2933) | 2026<br>(1590-2573) | 2080<br>(1619-2682) | 1872<br>(1539-2498)             | 2104<br>(1617-2457) | 1788<br>(1432-2558) | 2005<br>(1631-2511)            | 1992<br>(1596-2595) | 1756<br>(1425-2294) |
| DASH scores                                | 24<br>(22-27)       | 24<br>(22-26)       | 24<br>(21-27)       | 24<br>(22-27)       | 24<br>(22-27)       | 24<br>(22-26)       | 24<br>(21-26)                   | 24<br>(22-26)       | 24<br>(21-26)       | 23<br>(21-26)                  | 24<br>(22-27)       | 24<br>(22-26)       |

Abbreviations: DHPPA, 3-(3,5-Dihydroxyphenyl)-1-propanoic acid; DHBA, 3,5-dihydroxybenzoic acid; METS, metabolic equivalent tasks; DASH, dietary approaches to stop

hypertension.

<sup>a</sup>Variables were adjusted for age except for age and alkylresorcinols metabolites. Continuous variables were expressed as mean (standard deviation) or median (interquartile range) according to the distribution of the variables, while categorical variables are presented as percentage. *P* values were calculated from the one-way analysis of variance or Kruskal-Wallis test for continuous variables and  $\chi^2$  test for categorical variables. First urinary DHPPA: \**P* value < 0.05, \*\**P* value < 0.01; First urinary DHBA: †*P* value < 0.05, ††*P* value <

0.01; Second urinary DHPPA: ‡*P* value < 0.05, ††*P* value < 0.01; Second urinary DHBA: §*P* value < 0.05, §§*P* value < 0.01.

**Supplementary Table 2** Subgroup analysis on the association between urinary total alkylresorcinols metabolites and body fat measures in one-year longitudinal repeated-measures in Huoshan, China.

| body fat measures   | Age                       |                           | <i>P</i> <sub>interaction</sub> | Sex                        |                           | <i>P</i> <sub>interaction</sub> | Physical activity         |                            | <i>P</i> <sub>interaction</sub> | Total energy intake       |                           | <i>P</i> <sub>interaction</sub> |
|---------------------|---------------------------|---------------------------|---------------------------------|----------------------------|---------------------------|---------------------------------|---------------------------|----------------------------|---------------------------------|---------------------------|---------------------------|---------------------------------|
|                     | <60                       | ≥60                       |                                 | Male                       | Female                    |                                 | Low <sup>a</sup>          | High <sup>b</sup>          |                                 | Low <sup>a</sup>          | High <sup>b</sup>         |                                 |
| No. of participants | 460                       | 152                       |                                 | 277                        | 335                       |                                 | 305                       | 307                        |                                 | 306                       | 306                       |                                 |
| WC                  | -0.07<br>(-0.45,<br>0.30) | 0.07<br>(-0.78,<br>0.93)  | 0.616                           | -0.05<br>(-0.43,<br>0.33)  | -0.31<br>(-0.82,<br>0.21) | 0.881                           | 0.09<br>(-0.39,<br>0.56)  | -0.56<br>(-1.13,<br>0.02)  | 0.126                           | -0.08<br>(-0.70,<br>0.55) | -0.26<br>(-0.79,<br>0.28) | 0.687                           |
| HC                  | 0.05<br>(-0.37,<br>0.48)  | -0.38<br>(-0.96,<br>0.21) | 0.125                           | -0.03<br>(-0.48,<br>0.42)  | 0.10<br>(-0.35,<br>0.54)  | 0.404                           | -0.08<br>(-0.72,<br>0.57) | -0.44<br>(-0.84,<br>-0.03) | 0.982                           | -0.01<br>(-0.35,<br>0.34) | -0.40<br>(-1.05,<br>0.26) | 0.797                           |
| WHR                 | -0.47<br>(-0.75,<br>0.14) | 0.38<br>(-0.39,<br>1.15)  | 0.227                           | -0.30<br>(-0.78,<br>0.19)  | -0.39<br>(-0.95,<br>0.16) | 0.467                           | 0.03<br>(-0.58,<br>0.64)  | -0.22<br>(-0.64,<br>0.19)  | 0.063                           | 0.05<br>(-0.47,<br>0.57)  | -0.31<br>(-0.91,<br>0.30) | 0.379                           |
| BMI                 | -0.16<br>(-0.47,<br>0.15) | -0.50<br>(-1.16,<br>0.17) | 0.099                           | -0.42<br>(-0.81,<br>-0.03) | -0.18<br>(-0.58,<br>0.21) | 0.397                           | -0.36<br>(-0.81,<br>0.09) | -0.41<br>(-0.98,<br>0.16)  | 0.867                           | -0.40<br>(-0.89,<br>0.09) | -0.23<br>(-0.72,<br>0.27) | 0.559                           |
| Weight              | -0.22<br>(-0.50,<br>0.05) | -0.13<br>(-0.62,<br>0.36) | 0.953                           | -0.36<br>(-0.66,<br>-0.05) | -0.18<br>(-0.54,<br>0.18) | 0.372                           | -0.33<br>(-0.69,<br>0.02) | -0.33<br>(-0.80,<br>0.15)  | 0.370                           | -0.45<br>(-0.94,<br>0.04) | -0.19<br>(-0.56,<br>0.19) | 0.270                           |

Abbreviations: WC, waist circumference; HC, hip circumference; WHR, waist to hip ratio; BMI, body mass index.

Data was presented as percentage changes and 95% confidence intervals (CIs) in obesity markers for each 1 µg/g creatinine increase in urinary total alkylresorcinols metabolites, expressed as  $(\exp(\beta)-1) \times 100\%$ . Covariates adjusted in the model was the same as those in Table 2 (see Table 2 footnote). Of note, variables examined in this table was not adjusted. Variables were log transformed.

<sup>a</sup>Low: less than the median; <sup>b</sup>High: equal to or greater than the median.

**Supplementary Table 3** Subgroup analysis on the association between the average concentrations of urinary total alkylresorcinols metabolites and fat measures after 1-year of follow-up in Huoshan, China.

| fat measures        | Age                         |                           | <i>P</i> <sub>interaction</sub> | Sex                       |                             | <i>P</i> <sub>interaction</sub> | Physical activity          |                            | <i>P</i> <sub>interaction</sub> | Total energy intake        |                            | <i>P</i> <sub>interaction</sub> |
|---------------------|-----------------------------|---------------------------|---------------------------------|---------------------------|-----------------------------|---------------------------------|----------------------------|----------------------------|---------------------------------|----------------------------|----------------------------|---------------------------------|
|                     | <60                         | ≥60                       |                                 | Male                      | Female                      |                                 | Low <sup>a</sup>           | High <sup>b</sup>          |                                 | Low <sup>a</sup>           | High <sup>b</sup>          |                                 |
| No. of participants | 227                         | 79                        |                                 | 139                       | 167                         |                                 | 152                        | 154                        |                                 | 153                        | 153                        |                                 |
| BFM                 | -4.15<br>(-8.07,<br>-0.06)  | 1.75<br>(-6.76,<br>11.04) | 0.943                           | -2.46<br>(-7.76,<br>3.13) | -5.70<br>(-10.48,<br>-0.67) | 0.222                           | -4.23<br>(-8.89,<br>0.67)  | -3.75<br>(-8.43,<br>1.18)  | 0.668                           | -4.65<br>(-9.98,<br>0.98)  | -3.75<br>(-8.43,<br>1.18)  | 0.531                           |
| PBF                 | -1.99<br>(-4.76,<br>0.87)   | -0.57<br>(-6.45,<br>5.68) | 0.520                           | -1.03<br>(-4.92,<br>3.01) | -3.97<br>(-7.05,<br>-0.80)  | 0.133                           | -3.03<br>(-5.96,<br>0.00)  | -2.09<br>(-5.61,<br>1.55)  | 0.313                           | -2.77<br>(-6.30,<br>0.89)  | -2.09<br>(-5.61,<br>1.55)  | 0.427                           |
| VFL                 | -6.36<br>(-11.08,<br>-1.40) | 2.88<br>(-7.37,<br>14.25) | 0.531                           | -3.44<br>(-9.50,<br>3.02) | -7.32<br>(-13.31,<br>-0.91) | 0.264                           | -5.43<br>(-11.01,<br>0.50) | -5.51<br>(-11.13,<br>0.47) | 0.811                           | -5.48<br>(-11.88,<br>1.39) | -5.51<br>(-11.13,<br>0.47) | 0.720                           |
| CAP                 | -2.81<br>(-4.84,<br>-0.73)  | 1.56<br>(-2.91,<br>6.24)  | 0.208                           | -2.21<br>(-4.65,<br>0.29) | -2.18<br>(-5.04,<br>0.77)   | 0.948                           | -1.52<br>(-3.88,<br>0.91)  | -2.88<br>(-5.29,<br>-0.41) | 0.221                           | -2.48<br>(-5.25,<br>0.37)  | -2.88<br>(-5.29,<br>-0.41) | 0.627                           |

Abbreviations: BFM, body fat mass; PBF, percent body fat; VFL, visceral fat level; CAP, controlled attenuation parameter.

Data was presented as percentage changes and 95% confidence intervals (CIs) in obesity markers for each 1 µg/g creatinine increase in urinary total alkylresorcinols metabolites, expressed as  $(\exp(\beta)-1) \times 100\%$ . Covariates adjusted in the model was the same as those in Table 3 (see Table 3 footnote). Of note, variables examined in this table was not adjusted. Variables were log transformed.

<sup>a</sup>Low: less than the median; <sup>b</sup>High: equal to or greater than the median.
